# Supplementary material
Source: PubMed Central journal article supplement (PMC2602916)

**Supplemental Fig. 1. FTICR analysis of Rpl42ab derived from wild type (BY4742),  $\Delta Ybr030w$ ,  $\Delta SET7$ , and the double knockout  $\Delta Ybr030w \Delta SET7$  strains.** We show here the 15+ ion profile of intact Rpl42ab demonstrating unmodified forms (0Me), monomethylation (1Me) and dimethylation (2Me).

**Supplemental Fig. 2. Electron capture dissociation spectrum of the c43 fragment (containing Lys-40) produced from wild type monomethylated Rpl42ab.** The +6 c43 fragment ion containing three  $^{13}\text{C}$  atoms is labelled for the unmodified (816.96) and the monomethylated (819.29) m/z peaks. The ion intensities of the two species provide an estimate of the relative level of monomethylated Rpl42ab at Lys-55 (m/z = 816.96) and monomethylated Rpl42ab at Lys-40 (m/z = 819.29).

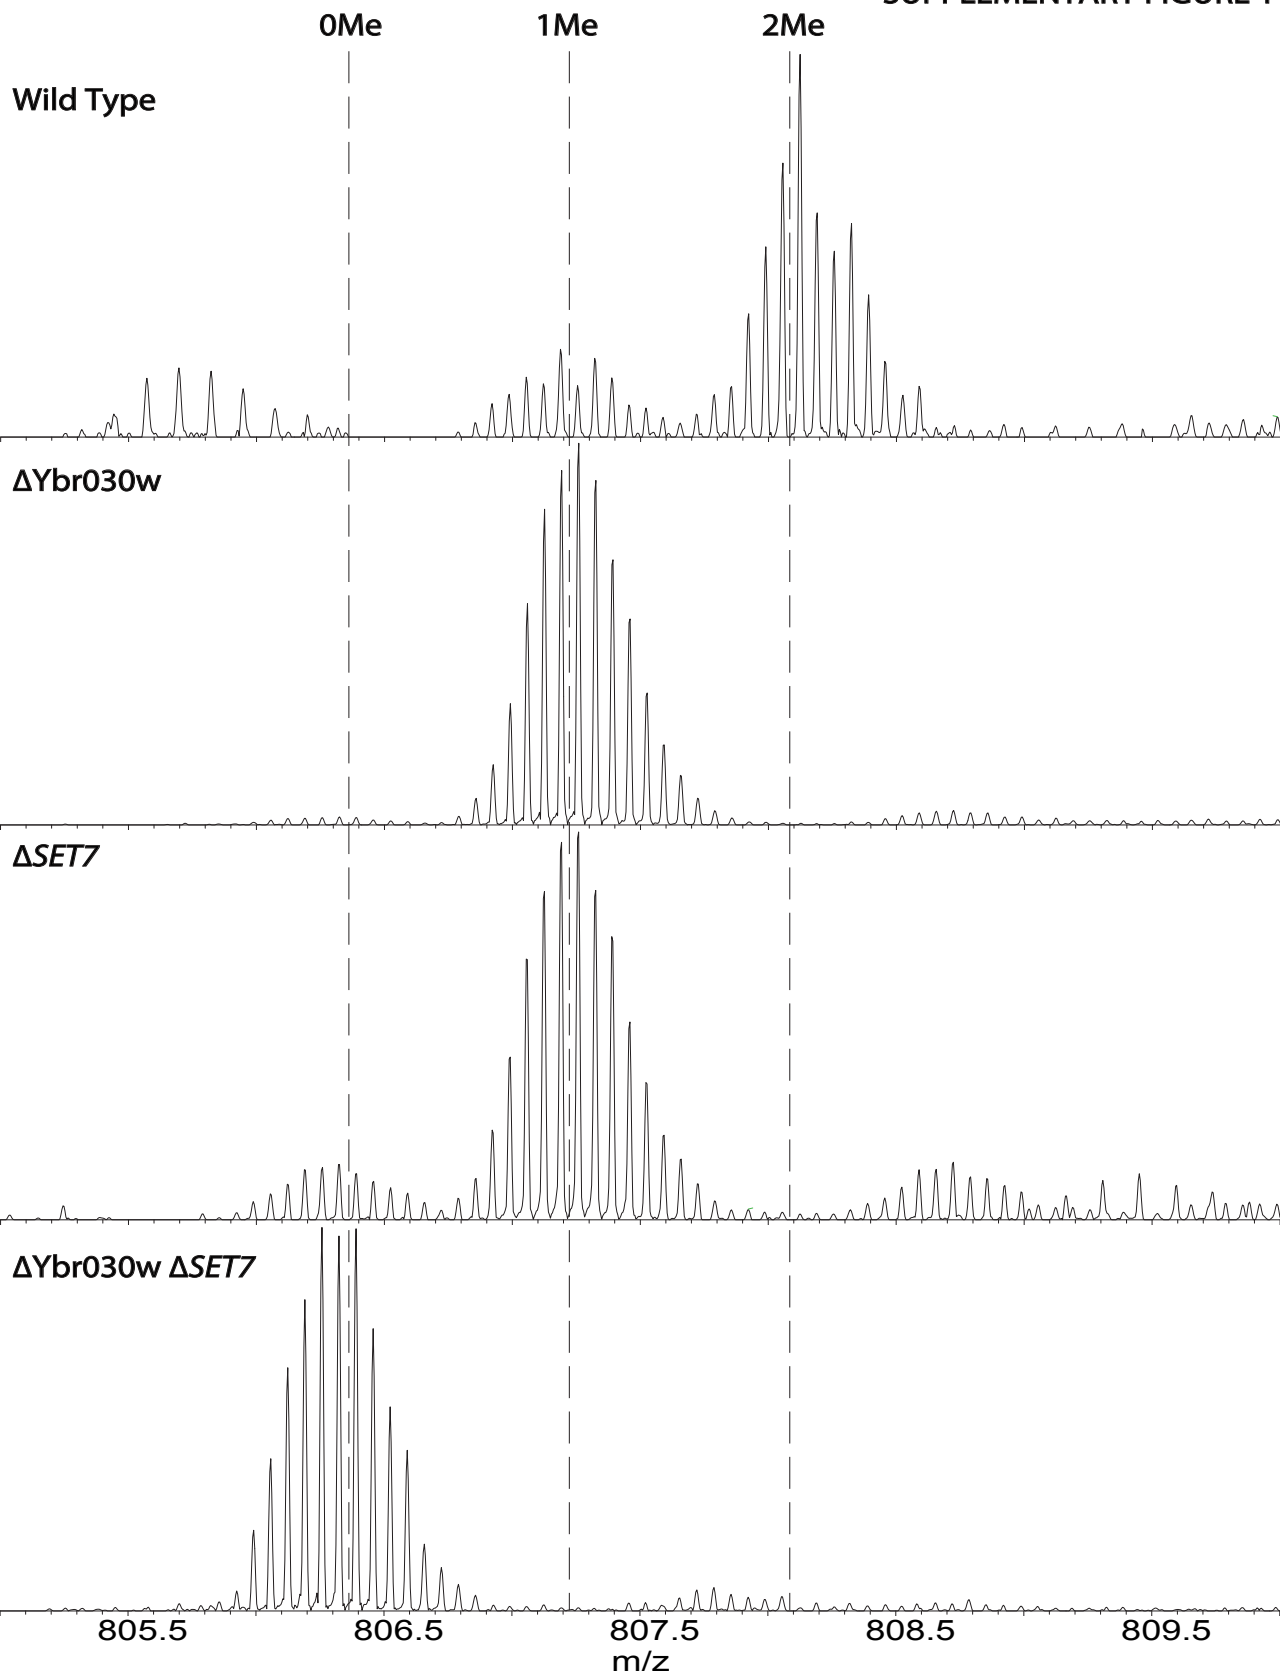

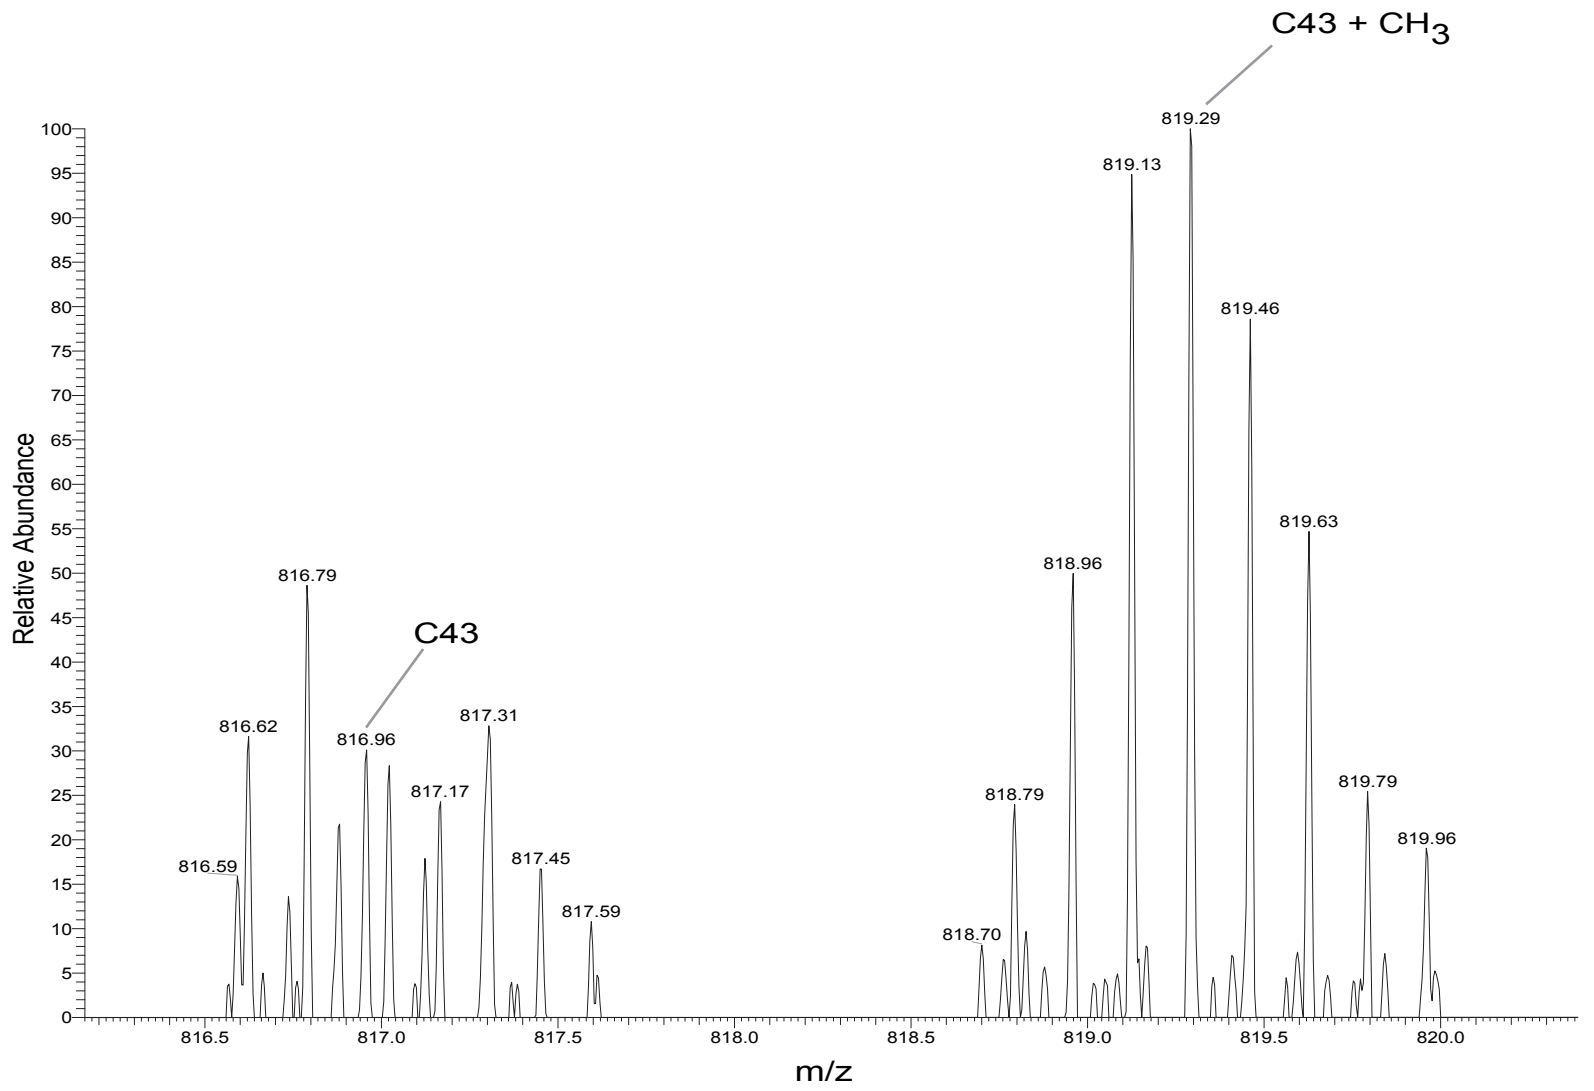

Supplement: M806006200_1.pdf [file M806006200_1.pdf]
